# Supplementary material
Source: Research Square preprint supplement (doi:10.21203/rs.3.rs-9146978/v1)
Supplement: Supplementary file 1 [file 463d01a3a68729c68b93ec57.pdf]

## Supporting information

1  
2 **Supplementary Data Set S1.** CDS of ten homologous genes of the eIF5A family in  
3 *N. tabacum*.

4 >eIF5A-1

5 ATGTCGGACGAAGAACACCATTTTGAATCAAAGGCCGATGCCGGAGCATC  
6 AAAGACATATCCTCAACAAGCTGGTACTATTCGTAAGAATGGTCATATCGTC  
7 AAAAAAACCGCCCTTGCAAGGTAGTTGAAGTTTCCACTTCCAAGACAGG  
8 CAAGCACGGTCATGCTAAATGCCACTTTGTGGCTATTGACATTTTCACTGGA  
9 AAGAAGCTTGAAGATATTGTTCCCTCTTCTCACA ACTGTGATGTTCCCTCATG  
10 TGAATAGGACTGACTATCAGCTTATTGATATCTCTGAGGATGGATTTGTGAG  
11 TCTGTTGACTGAAAATGGTAACACCAAGGATGACTTGAGGCTCCCAACTGA  
12 CGATAATCTTCTGGCCCTGATCAAAGATGGTTTTGCTGAGGGGAAGGACCT  
13 GGTTCTGTCAGTGATGTCTGCCATGGGAGAGGAGCAGATTTGTGGTATCAA  
14 GGACGTTGGCCCCAAGTAG

15 >eIF5A-2

16 ATGTCGGACGAAGAGCACCACTTTGAATCAAAGGCCGACGCCGGAGCTTC  
17 AAAGACCTATCCTCAGCAGGCTGGTACTATTCGTAAGAATGGTCATATCGTC  
18 ATCAAAAACCGTCCTTGCAAGGTAGTTGAAGTTTCCACTTCCAAGACAGGC  
19 AAGCACGGTCATGCTAAATGCCATTTTGTGGCGATTGACATTTTCACTGGAA  
20 AGAAGCTTGAAGATATTGTTCCCTCTTCTCACAATTGTGATGTTCCCTCATGT  
21 GAATAGGACTGACTATCAGCTTATTGATATCTCTGAGGATGGATTTGTGAGT  
22 CTGTTGACTGAAAATGGTAACACCAAGGATGACTTGAGGCTCCCAACTGA  
23 CGATAGTCTTCTGTCCCTGATCAAAGATGGTTTTGCTGAGGGGAAGGACCT  
24 GGTTCTGTCAGTGATGTCTGCCATGGGAGAGGAGCAGATTTGTGGTATCAA  
25 GGACATTGGCCCCAAGTAG

26 >eIF5A-3

27 ATGTCGGACGAGGAGCACCAGTTTGAGTCAAAGGCCGATGCCGGTGCATC  
28 TAAAACTTACCCTCAACAAGCTGGTACTATCCGTAAGAACGGTCACATCGT  
29 CATCAAAGGCCGTCCCTGCAAGGTTGTGGAAGTCTCTACATCCGAAACTGG  
30 AAAGCATGGTCATGCAAAATGTCATTTTGTGCTATAGACATCTTCACTGGA  
31 AAGAAGCTTGAGGATATTGTTCCATCTTCACACAATTGTGATGTGCCCCATG  
32 TTAATCGTACAGATTATCAGCTTATTGACATCTCTGAAGATGGATTTGTGAGT  
33 CTGCTCACCGAGAATGGTAACACCAAGGATGACCTTAGGCTGCCTACTGAT  
34 GACAACCTCCTTACACAGATCAAGGATGGGTTTGCTGAGGGAAAAGACCT  
35 TGTCGTGTCTGTCATGTCGGCCATGGGTGAGGAGCAGATTTGTGCCCTGAA  
36 GGATATTGGTCCCAAGTAA

37 >eIF5A-4

38 ATGTCTGATGAAGAACACCATTTTGAGTCAAAGCAGATGCTGGTGCCTCT  
39 AAAACTTACCCTCAACAAGCTGGTACCATTCGCAAAAATGGTTATATAGTTA  
40 TTAAAGGCAGACCTTGCAAGGTTGTTGAGGTCTCCACTTCAAAAAGTGGC  
41 AAGCACGGACATGCAAAATGTCACTTTGTGGCAATTGATATTTTCAATGGA  
42 AAGAAGCTTGAAGATATTGTTCCCTCCCACTGTGATGTGCCCCATG  
43 TTAATCGTACCGACTATCAGCTGATTGACATCTCTGAAGATGGTTTTGTGTC  
44 TCTTCTTACTGAAAATGGAAACACCAAAGATGACCTCAGGCTTCCCACCGA  
45 TGAAAACCTGCTGAACCAGGTTAAAGGTGGATTTGAGGAAGGAAAGGATC  
46 TTGTGTTGTCTGTGATGTCTGCAATGGGTGAAGAGCAGATTGCTGCTGTGA  
47 AGGACATTGGTACCAAGAAGTAA

48 >eIF5A-5

49 ATGTCGGACGAAGAACACCATTTTGAGTCAAAGGCAGATGCAGGCGCCTC  
50 CAAAAGTACCCTCAACAAGCTGGTACTATCCGCAAAAATGGTTATATAGTC  
51 ATCAAGGGCCGTCCCTGCAAGGTTGTTGAGGTCTCCACTTCAAAAAGTGG  
52 CAAGCACGGACATGCTAAATGTCACTTTGTGGCAATTGACATTTTCAATGG  
53 AAAGAACTTGAAGATATCGTTCCTCCCACTGTGATGTGCCACA

54 TGTCAATCGTACAGACTATCAGCTGATTGACATCTCTGAAGATGGTTTTGTC  
55 TCCCTTCTTACTGAAAGTGGAAACACCAAGGATGACCTCCGTCTCCCCACC  
56 GATGAAGCTCTGCTGAAGCAGGTAAAGATGGGTTTCAGGAAGGAAAGGA  
57 TCTTGTGGTGTCTGTTATGTCTGCAATGGGCGAAGAGCAGATTAATGCCGTT  
58 AAGGACATTGGTACCAAGAAGTAG

59 >eIF5A-6

60 ATGTCGGACGAGGAGCATCAGTTTGAGTCAAAGGCCGACGCCGGAGCTTC  
61 GAAGACTTATCCTCAACAAGCTGGTACTATTCGTAAGAACGGTTACATTGTC  
62 ATCAAAGCCCGCCCTTGCAAGGTCGTGGAAGTGTCTACTTCCAAGACTGGC  
63 AAGCACGGACATGCCAAATGTCACCTTTGTTGCAATTGATATCTTCACTGGCA  
64 AGAAGCTCGAGGATATCGTTCCTCTTCACACAATTGTGATGTCCCCCATGT  
65 TAATCGTACAGATTACCAACTCATTGACATCTCTGAGGATGGATTTGTGAGT  
66 CTACTIONACTGAAAATGGTAGTACCAAGGATGACCTCAGGCTTCCAACAGAT  
67 GAGAATCTTCTCACGCAGATCAAGGATGGATTTGCTGAGGGCAAAGACCTT  
68 GTTGTGTCTGTCATGTCTGCCATGGGTGAGGAGCAGATTTGTGCACTGAAG  
69 GATATTGGTCCAAAGTAA

70 >eIF5A-7

71 ATGTCTGATGAAGAACACCATTTTGAGTCAAAGCAGATGCTGGTGCCTCT  
72 AAAACTTATCCTCAACAAGCTGGTACCATTCGTAAAAATGGTTATATAGTTA  
73 TTAAAGGCAGACCCTGCAAGGTTGTTGAGGTCTCCACTTCAAAAAGTGGC  
74 AAGCACGGACATGCAAAATGTCACCTTTGTAGCAATTGATATTTCAATGGA  
75 AAGAAGCTTGAAGATATCGTTCCTTCCCTCCCACAAGTGTGATGTGCCCCAT  
76 GTTAATCGTACCGACTATCAGCTGATTGACATCTCTGAAGATGGTTTTGTGT  
77 CTCTTCTTACTGAAAATGGAAACACCAAGACGACCTCAGGCTTCCCACCG  
78 ATGAAGCCCTGCTGAGCCAGGTAAAGGTGGATTTGAGGAAGGAAAGGAT  
79 CTTGTGTTGTCTGTGATGTCTGCAATGGGTGAAGAGCAGATTGCCGCTGTT  
80 AAGGACATTGGTACCAAGAAGTAG

81 >eIF5A-8

82 ATGTCGGACGAAGAGCATCATTTTGAGTCGAAGGCAGATGCAGGCGCCTC  
83 CAAAACCTTACCCTCAACAAGCTGGTACTATCCGCAAAAATGGTTATATAGTC  
84 ATCAAAGGCCGCCCTGCAAGGTTGTTGAGGTCTCCACTTCAAAAACCTGG  
85 CAAGCACGGACATGCTAAATGTCACCTTTGTGGCAATTGACATTTTCAATGG  
86 AAAGAACTTGAAGATATCGTTCCTTCCTCCCACAACCTGTGATGTGCCACA  
87 TGTCAATCGTACAGACTATCAGCTGATTGACATCTCTGAAGATGGTTTTGTC  
88 TCCCTTCTTACTGAAAGTGGAAACACCAAGGATGATCTCCGGCTTCCCCT  
89 GATGAGGCTCTGCTGAAGCAGGTTAAAGATGGGTTTCAGGAAGGAAAGGA  
90 TCTTGTGCTGTCTGTTATGTCTGCAATGGGCGAAGAGCAGATTAATGCCGTT  
91 AAGGACATTGGTACCAAGAAGTAG

92 >eIF5A-9

93 ATGTCGGACGAGGAGCACCAATTTGAGTCAAAGGCAGATGCCGGTGCATC  
94 TAAAACCTTACCCTCAACAAGCTGGTACTATCCGTAAGAACGGTCATATCGTC  
95 ATCAAAGGCCGTCCTGCAAGGTTGTGGAAGTCTCTACATCCAAAACCTGGA  
96 AAGCACGGTCATGCAAAAATGTCATTTTGTGCTATTGACATCTTCACTGGAA  
97 AGAAGCTTGAGGATATTGTTCCCTCTTACACAATTGTGATGTGCCCCATGT  
98 TAATCGTACAGATTATCAGCTTATTGACATCTCTGAAGATGGATTTGTGAGT  
99 CTGCTCACTGAGAATGGTAACACCAAGGATGACCTTAGGCTTCCTACTGAT  
100 GACAACCTCCTTACACAGATCAAGGATGGTTTTGCTGAGGGAAAAGACCTT  
101 GTTGTGTCTGTCATGTCAGCCATGGGTGAGGAGCAGATTTGTGCCCTGAAG  
102 GATATTGGTCCCAAGTAA

103 >eIF5A-10

104 ATGTCGGACGAGGAGCATCAGTTTGAGTCAAAGGCCGACGCCGGAGCTTC  
105 GAAGACTTATCCTCAACAAGCTGGTACTATTCGTAAGAACGGTTACATTGTC  
106 ATCAAAGCCC GCCCTTGCAAGGTCGTGGAAGTGTCTACTTCCAAGACTGGC  
107 AAGCACGGACATGCCAAATGTCACCTTTGTTGCAATTGATATCTTCACTGGCA

108 AGAAGCTCGAGGATATCGTTCCTCTTCACACAATTGTGATGTCCCCCATGT  
109 TAATCGTACAGATTACCAACTCATTGACATCTCTGAGGATGGATTTGTGAGT  
110 CTACTCACTGAAAATGGTAGTACCAAGGATGACCTCAGGCTTCCAACAGAT  
111 GAGAATCTTCTCACGCAGATCAAGGATGGATTTGCTGAGGGCAAAGACCTT  
112 GTTGTGTCTGTCATGTCTGCCATGGGTGAGGAGCAGATTTGTGCACTGAAG  
113 GATATTGGTCCAAAGTAA

114

115 **Supplementary Data Set S2.** The CDS sequences of the eIF5A of other 20 plant  
116 species

117 >*Nicotiana benthamiana* eIF5A

118 ATGTCTGACGAAGAACACCATTTTGAGTCCAAAGCTGATGCTGGTGCTTCA  
119 AAAACTTACCCACAACAAGCAGGCACTATTCGCAAGAATGGTTATATAGTT  
120 ATCAAAGGAAGACCCTGCAAGGTTGTTGAGGTCTCCACTTCCAAAAGTGG  
121 CAAGCACGGACATGCAAAATGTCACCTTTGTGGCAATTGACATTTTCAATGG  
122 AAAGAAGCTTGAAGATATTGTTCCCTTCATCTCACAATTGTGATGTGCCACAT  
123 GTCAACCGTACAGACTATCAGCTGATTGACATCTCTGAAGATGGTTTTGTGT  
124 CTCTTCTTACTGAAAATGGAAACACCAAAGATGACCTCAGGCTTCCCACCG  
125 ATGACACCCTGCTGAGCCAGGTAAAGGTGGATTTGAGGAAGGAAAGGAT  
126 CTCGTGCTGTCGGTGATGTCTGCAATGGGTGAAGAACAGATTTGTGCTGTG  
127 AAGGACATTGGCAAGAAGACTAG

128 >*Capsicum annuum* eIF5A

129 ATGTCTGACGAAGAACACCATTTTGAGTCCAAAGCTGATGCTGGTGCTTCA  
130 AAAACTTACCCACAACAAGCAGGCACTATTCGCAAGAATGGTTATATAGTT  
131 ATCAAAGGAAGACCCTGCAAGGTTGTTGAGGTCTCCACTTCCAAAAGTGG  
132 CAAGCACGGACATGCAAAATGTCACCTTTGTGGCAATTGACATTTTCAATGG  
133 AAAGAAGCTTGAAGATATTGTTCCCTTCATCTCACAATTGTGATGTGCCACAT  
134 GTCAACCGTACAGACTATCAGCTGATTGACATCTCTGAAGATGGTTTTGTGT  
135 CTCTTCTTACTGAAAATGGAAACACCAAAGATGACCTCAGGCTTCCCACCG  
136 ATGACACCCTGCTGAGCCAGGTAAAGGTGGATTTGAGGAAGGAAAGGAT  
137 CTCGTGCTGTCGGTGATGTCTGCAATGGGTGAAGAACAGATTTGTGCTGTG  
138 AAGGACATTGGCAAGAAGACTAG

139 >*Solanum verrucosum* eIF5A

140 ATGTCTGATGAAGAACACCATTTTGAGTCCAAAGCTGATGCTGGTGCCTCA  
141 AAAACTTACCCTCAACAAGCTGGTACTATTCGCAAGAATGGTTATATAGTTA  
142 TCAAAGGCAGACCTTGCAAGGTTGTTGAGGTCTCCACTTCCAAAACCTGGC  
143 AAGCACGGACATGCAAAATGTCACCTTTGTGGCAATCGACATTTTCAATGGA  
144 AAGAAGCTTGAAGATATTGTTTCCTTCATCCCACAATTGTGATGTGCCACATG  
145 TCAATCGTACTGACTATCAACTGATTGACATCTCTGAAGATGGTTTTGTGTC  
146 TCTTCTTACTGAAAATGGAAACACCAAAGATGACCTCAGACTTCCCACCGA  
147 TGACGCCCTGTTGACCCAGGTTAAAGGTGGATTTGAGGAAGGAAAGGATC  
148 TCGTTCTGTCTGTGATGTCTGCAATGGGTGAAGAGCAGATCTGTGCTGTGA  
149 AGGACATTGG

150 >*Solanum lycopersicum* eIF5A

151 ATGTCTGATGAAGAACACCATTTTGAGTCCAAAGCTGATGCTGGTGCCTCA  
152 AAAACTTACCCTCAACAAGCTGGTACTATTCGCAAGAATGGTTATATAGTTA  
153 TCAAAGGCAGACCTTGCAAGGTTGTTGAGGTCTCCACTTCCAAAACCTGGC  
154 AAGCATGGACATGCAAAATGTCACCTTTGTGGCAATCGACATTTTCAATGCA  
155 AAAAAGCTTGAAGATATTGTTTCCTTCATCCCACAATTGTGATGTGCCACATG  
156 TCAATCGTACTGACTATCAGCTGATTGACATATCTGAAGATGGTTTTGTGTC  
157 TCTTCTTACTGAAAATGGAAACACCAAAGACGACCTCAGACTTCCCACCG  
158 ATGACACCCTGTTGAACCAGGTTAAAGGTGGATTTGAGGAAGGAAAGGAT  
159 CTCGTTCTGTCTGTGATGTCTGCAATGGGTGAAGAGCAGATCTGTGCTGTG  
160 AAGGACATTGG

161 >*Nicotiana tabacum* eIF5A

162 ATGTCGGACGAAGAACACCATTTTGAGTCAAAGGCAGATGCAGGCGCCTC  
163 CAAAACCTTACCCTCAACAAGCTGGTACTATCCGCAAAAATGGTTATATAGTC  
164 ATCAAGGGCCGTCCTGCAAGGTTGTTGAGGTCTCCACTTCAAAAACCTGG  
165 CAAGCACGGACATGCTAAATGTCACCTTTGTGGCAATTGACATTTTCAATGG  
166 AAAGAAACTTGAAGATATCGTTTCCTTCCTCCCACAACCTGTGATGTGCCACA

167 TGTCAATCGTACAGACTATCAGCTGATTGACATCTCTGAAGATGGTTTTGTC  
168 TCCCTTCTTACTGAAAGTGGAAACACCAAGGATGACCTCCGTCTCCCCACC  
169 GATGAAGCTCTGCTGAAGCAGGTAAAGATGGGTTTCAGGAAGGAAAGGA  
170 TCTTGTGGTGTCTGTTATGTCTGCAATGGGCGAAGAGCAGATTAATGCCGTT  
171 AAGGACATTGGTACCAAGAAGTAG

172 >*Nicotiana attenuata* eIF5A

173 ATGTCTGATGAAGAACACCATTTTGAGTCAAAAGCTGATGCTGGTGCCTCT  
174 AAAACTTACCCTCAACAAGCTGGTACCATTCGTAAAAATGGTTATATAGTTA  
175 TTAAAGGCAGACCCTGCAAGGTTGTTGAGGTCTCCACTTCAAAAAGTGGC  
176 AAGCACGGACATGCAAAATGTCACCTTGTGGCAATTGATATTTTCAATGGA  
177 AAGAAGCTTGAAGATATTGTTCCCTCCCACTGTGATGTGCCCCATG  
178 TTAATCGTACCGACTATCAGCTGATTGACATCTCTGAAGATGGTTTTGTGTC  
179 TCTTCTTACTGAAAATGGAAACACCAAAGACGACCTCAGGCTTCCCACCG  
180 ATGAAGCCCTGCTGAACCAGGTAAAGGTGGATTTGAGGAAGGAAAGGAT  
181 CTTGTGTTGTCTGTGATGTCTGCAATGGGCGAAGAGCAGATTGCCGCTGTT  
182 AAGGACATTGG

183 >*Salvia miltiorrhiza* eIF5A

184 ATGTCGGACGAGGAGCATCAGTTCGAGTCGAAGGCCGACGCCGGTGCTTC  
185 AAAAACCTACCCTCAGCAAGCTGGCACCATCCGCAAAAATGGGTACATAGT  
186 TATCAAAGGGAGGCCTTGCAAGGTCGTTGAAGTCTCTACTTCGAAGACTGG  
187 CAAGCATGGACATGCTAAGTGTCACCTTGTGGCGATCGACATATTTAATGGC  
188 AAAAAGCTTGAAGACATTGTCCCGTCCTCCCACTGTGATGTGCCTCAT  
189 GTCAATCGTACTGATTATCAACTGATTGACATCTCTGAAGATGGTTTTGTTT  
190 CTCTTCTGACTGAAAATGGAAACACCAAAGATGATCTTAGGCTTCCAAGT  
191 ATGACAGTCTGCTTGGTCCGATTAAGTGGGTTTGAGGAAGGAAAAGAC  
192 CTCGTGGTGTCCGGTCATGTCTGCAATGGGCGAAGAGCAGAT

193 >*Quercus robur* eIF5A

194 GAGGAGCACCACCTTTGAGTCCAAGGCTGACGCTGGAGCCTCAAAGACTTA  
195 CCCTCAGCAAGCTGGTACCATTCGCAAGAATGGCTATATTGTCATCAAGAA  
196 CAGGCCTTGCAAGGTTGTTGAAGTTTCCACTTCAAAAACAGGAAAGCATG  
197 GACATGCAAAGTGTCACTTTGTTGGAATCGACATATTTAATGGGAAGAAGC  
198 TTGAAGATATTGTTCCCTTCATCCCACAACACTGTGATGTTCCCTCATGTTAATCGT  
199 ACTGACTACCAGTTGATTGATATCTCTGAAGATGGTTTTGTGAGTCTTCTAA  
200 CTGAGAATGGAAACACCAAGGATGATCTGAGGCTTCCCCTGATGACAGT  
201 CTGCTTAGCCAGATTAAAGATGGGTTTGCTGATGGAAAGGACCTTGTGGTG  
202 ACTGTCATGTCTGCAATGGGAGAGGAGCAGATCTGTGCCCTTAAGGACATT  
203 GGC

204 >*Salvia hispanica* eIF5A

205 ATGTCGGACGAGGAGCATCAGTTTGAGTCCAAGGCAGATGCCGGTGCCTC  
206 CAAGACTTACCCTCAGCAAGCTGGAACCATCCGCAAAAATGGCCACCTAG  
207 TCATCAAAGGGAGGCCTTGCAAGGTCGTTGAAGTCTCTACCTCAAAGACC  
208 GGCAAGCACGGACACGCCAAGTGTCACTTTGTGGCAATTGACATATTTAAT  
209 GGCAAAAAGCTTGAAGATATTGTGCCATCATCTCACAACACTGTGATGTGCCT  
210 CATGTCAACCGTACTGATTATCAACTGATTGACATCTCTGAAGATGGTTTTG  
211 TTTCTCTTTTGACTGAAAATGGCAACACTAAAGATGATCTTAGGCTTCCAAC  
212 TGATGAGACTCTGCTTGGCCAGATTAAAAGTGGGTTTCGAGGAAGGAAAGG  
213 ACCTTGTGGTGTGTCAGTCATGTCTGCAATGGGCGAAGAGCAGAT

214 >*Pyrus x bretschneideri* eIF5A

215 ATGTCGGACGAGGAGCACCAGTTCGAATCCAAAGCCGACGCCGGAGCATC  
216 CAAGACCTACCCACAGCAGGCTGGTACCATCCGCAAGAATGGCTACATCGT  
217 CATAAAGGCCAGGCCTTGCAAGGTTGTTGAAGTCTCCACTTCCAAAACCTGG  
218 AAAGCACGGTCACGCTAAGTGTCACTTTGTGGCAATTGATATCTTCAATGG  
219 AAAGAAGCTTGAAGATATTGTTCCCTTCGTCCCACAATTGTGATGTTCCCAT  
220 GTCAACCGTACTGACTATCAGCTGATTGATATCTCCGAGGATGGCTTTGTGA

221 GTCTCTTGACTGAAAATGGAAACACCAAGGATGATCTGAGGCTGCCCACT  
222 GATGACAGTCTGCTTACCCAGATCAAGGACGGGTTAATGATGGAAAGGAT  
223 CTTGTGGTGACTGTCATGTCTGCCATGGGAGAGGAGCAGATATGTGCCCTT  
224 AAGGACATTGG

225 >*Mangifera indica* eIF5A

226 ATGTCCGACGAGGAGCACCCTTTGAATCAAAGGCTGATGCTGGAGCCTC  
227 CAAAACCTTTTCCTCAACAAGCTGGAACCATCCGCAAGAATGGATATATTGT  
228 CATCAAGAACCGTCCCTTGCAAGGTGGTTGAAGTTTCCACTTCAAAGACCG  
229 GAAAACATGGACATGCAAAGTGCCACTTTGTAGGAATCGATATCTTTACTG  
230 GGAAGAAGCTTGAAGATATTGTTCCCTTCATCCCACAACCTGTGATGTTCCCTCA  
231 TGTTAATCGAACTGACTATCAGCTGATTGATATCTCTGAAGATGGTTTTGTG  
232 AGTCTTCTCACTGAAAATGGGAGCACCAAGGATGATTTAAGGCTTCCCACT  
233 GATGAAAACCTGCTTACCCAGATTAAAGATGGGTTTGCCGAAGGAAAGGA  
234 CCTCGTGGTGTCTGTTATGTCTGCAATGGGAGAGGAGCAGATCTGTGCCCT  
235 TAAGGACATTGG

236 >*Impatiens glandulifera* eIF5A

237 ATGTCTGACGAGGAGCATCACTTTGAGTCCAAGGCCGACGCCGGCGCATC  
238 CAAAACCTTATCCCCAACAGGCTGGAACCATCCGCAAGGGAGGTCACATATG  
239 TATCAAAAACCGACCCTGCAAGGTGGTTGAAGTTTCTACCTCCAAAACCTGG  
240 GAAGCATGGACATGCTAAATGTCACCTTTGTTGCCATTGATATCTTTACTGCA  
241 AAGAAGCTTGAAGATATTGTTCCCTTCTTCTCACAATTGTGACGTTCCCTCATG  
242 TTAACCGTACTGACTATCAGCTGATTGACATCTCTGAAGATGGTTTTGTCAG  
243 TTTGCTCACTGAAAATGGAAACACCAAGGATGATTTGAGGCTTCCCACCGA  
244 TGACGCTCTCCTTACCCAGATTAAAGATGGGTTTGGTGAGGGTAAAGATCT  
245 GGTTGTGTCGGTTATGTCAGCCATGGGAGAGGAACAGATTTGTGCTCTTAA  
246 GGATATCGGCCCGAAGAACTA

247 >*Populus nigra* eIF5A

248 ATGTCGGACGAGGAGCACCACTTTGAATCAAAGGCTGATGCAGGAGCCTC  
249 CAAGACTTACCCTCAGCAAGCTGGTACTATCCGCAAGAATGGCTATATAGTC  
250 ATCAAGAACCGTCCTTGCAAGGTTGTTGAGGTTTCCACCTCAAAGACAGG  
251 CAAGCATGGACATGCTAAGTGCCACTTTGTGGGGATTGATATATTTAATGGG  
252 AAAAAGCTTGAAGATATTGTTCCCTTCATCTCACA ACTGTGATGTTCCCCATG  
253 TTAATCGTACTGATTATCAGCTGATTGATATCTCTGAAGATGGCTTTGTGAGT  
254 CTTTTGACTGAAAATGGAAATACCAAGGATGATCTGAGGCTTCCCACTGAT  
255 GATAGTCTGCTTACTCCGATTAAGATGGGTTTGGTGAAGGAAAGGACCTT  
256 GTGGTGACTGTCATGTCTGCCATGGGAGAGGAGCAGATCTGTGCCCTCAAG  
257 GACATTGG

258 >*Vicia villosa* eIF5A

259 ATGTCCGACGAAGAGCACCAATTCGAAGCCGCCGCGATGCCGGTGCCTC  
260 CAAGACCTACCCTCAGCAGGCCGGTACCATTCGCAAGAACGGGTACATCGT  
261 CATCAAAGGCAGGCCATGCAAGGTTGTTGAAGTTTCTACTTCAAAAACAG  
262 GAAAGCATGGACATGCAAAGTGTCACCTTGTGGCCATTGATATTTCAATGG  
263 GAAAAAGCTTGAAGATATTGTTCCCTTCATCTCACAATTGTGATGTTCCCCAT  
264 GTGAACCGTACCGACTATCAGCTGATTGATATTTCTGAAGATGGCTTTGTGA  
265 GTCTGTTGACTGATAATGGAAGTACCAAGGATGATTTGAAACTTCCCACTG  
266 ATGATGCACTTCTTACTCAGATTAAGGATGGATTTGCTGAAGGAAAAGATCT  
267 TGTGGTTTCTGTTCATGTCTGCAATGGGAGAAGAGCAGATCTGTTCTTTGAA  
268 GGACATAAGCAAGACCTAG

269 >*Malus ioensis* cultivar eIF5A

270 TCCAAGACCTACCCCCAGCAGGCCGGTACCATCCGCAAGAATGGCTACATC  
271 GTCATCAAGGCCAGGCCTTGCAAGGTTGTTGAAGTCTCCACTTCCAAAACC  
272 GGAAAGCACGGTCACGCTAAGTGTCACCTTGTGGCAATTGATATTTTCAAT  
273 GGAAAGAAGCTTGAAGATATTGTTCCCTTCGTCCCACAATTGTGATGTTCCCC  
274 ATGTCAACCGTACTGACTATCAGCTGATTGATATCTCCGAGGATGGCTTTGT

275 GAGTCTCTTGACTGAAAATGGAAACACCAAGGATGATCTGAGGCTGCCCA  
276 CTGATGACAGTCTGCTTACCCAGATCAAGGACGGGTTTAATGATGGAAAGG  
277 ATCTTGTGGTGACTGTCATGTCTGCCATGGGAGAGGAGCAGATCTGTGCCC  
278 TTAAGGACATTGG

279 >*Macadamia integrifolia* eIF5A

280 ATGTCGGACGAGGAGCATCACTTCGAGTCTAAGGCCGACGCTGGGGCGTC  
281 AAAGACTTACCCTCAGCAGGCTGGTACCATCCGCAAGAACGGTTACATTGT  
282 CATTAAAGGCCAGACCCTGCAAGGTTGTCGAAGTTTCCACCTCCAAAACCTGG  
283 CAAGCATGGTCATGCCAAGTGTCACTTTGTGGGGATTGATATCTTCAATGGA  
284 AAGAAGCTTGAAGATATTGTGCCTTCGTCCCACAACCTGTGATGTTCCCCAT  
285 GTTAATCGTACAGACTATCAGCTGATTGATATCTCTGAAGATGGTTTTGTGA  
286 GCCTTTTGACTGAAAATGGTAATACCAAGGATGATCTGAGGCTTCCAACTG  
287 ATGATAATCTGCTCACCCAGATCAAAGATGGCTTTGCTGAAGGAAAGGATC  
288 TTGTGGTTACGGTCATGTCGGCGATGGGGGAAGAGCAGATCTGCACCCTCA  
289 AAGACATTGGC

290 >*Nelumbo nucifera* eIF5A

291 ATGTCGGACGACGATCATCACTTTGAGTCTGAAGGCCGATGCTGGAGCATCC  
292 AAGACCTTTCCTCAGCAGGCTGGAACCATCCGTAAAAACGGCTACATCGTC  
293 ATTAAGGGAAGGCCCTGCAAGGTTGTTGAGGTCTCTACCTCCAAAACAGG  
294 GAAGCATGGTCATGCCAAGTGTCACTTTGTGGGTATTGATATATTTAATGGG  
295 AAGAAGCTTGAAGATATAGTACCTTCCTCCCACAACCTGTGATGCTCCCATG  
296 TTAATCGCACTGACTATCAGCTGATTGACATCTCTGAAGATGGTTTTGTGAG  
297 TCTTCTCACTGAAAGTGGGAACACCAAGGATGATTTGAGGCTTCCCACTGA  
298 TGATAATCTGCTCACCCAGATTAAAGATGGGTTTGCTGAAGGAAAGGATCT  
299 CGTGGTGACGGTCATGTCGGCAATGGGAGAAGAGCAGATCTGCGCCCTCA  
300 AGGACATTGGCCCCAAGAATA

301 >*Trifolium pratense* eIF5A

302 ATGTCGGACGAGGAACACCACTTCGATTCAGTTGCCGATGCCGGAGCCTCC  
303 AAAACCTACCCTCAGCAGGCCGGTACCATCCGCAAAAACGGTTACATCGTC  
304 ATCAAGGGCAGACCTTACAAGGTTGTTGAAGTTTCTATTTCAAAAACAGGA  
305 AAGCATGGACATGCAAAGTGTCACCTTTGTTGCAATTGATATCTTCAACGGC  
306 AAAAAGCTTGAAGATATTGTTCCCTTCATCTCACAATTGTGATGTTCCCTCATG  
307 TGAATCGTACTGATTATCAGCTGATTGATATCTCTGAAGATGGTTTTGTGAGT  
308 CTGTTGACTGATAACGGAAGTACCAAGGATGATCTGAAACTTCCCCTGAT  
309 GATAGTCTGCTTACTCAGATTAAAGATGGATTTGCTGAAGGAAAAGATCTT  
310 GTGGTTTCTGTCATGTCTGCAATGGGAGAAGAACATATATGTGCCCTGGAG  
311 GACATTGG

312 >*Helianthus annuus* eIF5A

313 ATGTCGGATGAAGAGCATCAGTTTGAGTCAAAAGCAGATGCAGGTGCATCC  
314 AAAACTTACCCTCAACAAGCTGGTACCATTCGTAAGAATGGTTATATTGTCA  
315 TCAAGAATCGTGCTTGCAAGGTTGTAGAAGTTTCAACATCCAAGACTGGAA  
316 AGCACGGTCATGCTAAATGCCACTTTGTTGGAATTGATATTTTCAATGGAAA  
317 GAAGCTTGAAGATATTGTTCCGTCCCTCCCACAATTGTGATGTTCCCTCATGTG  
318 AATCGTACCGACTACCAGCTTATTGATATATCAGAGGATGGATTTGTGAGTC  
319 TGCTGACTGAGAGTGGTGGCACTAAGGATGACCTCAGGCTCCCAACTGAT  
320 GACGCTCTGCTCACGCAGATAAAGGATGGTTTTAGTGAGGGAAAAGACCT  
321 TGTTGTGACAGTGATGTCTGCCATGGGAGAAGAGCAGATCTGTGCTCTTAA  
322 GGACATTGG

323 >*Malus domestica* eIF5A

324 ATGTCGGACGAGGAGCACCAGTTCGAATCCAAGGCCGACGCCGGCGCATC  
325 TAAGACCTATCCCCAGCAGGCTGGTACCATCCGCAAGAATGGCTACATCGT  
326 CATCAAGGCCAGACCTTGCAAGGTTGTTGAAGTCTCCACCTCCAAACTG  
327 GAAAGCACGGTCACGCTAAGTGCCACTTTGTGGCAATTGATATTTTCAATG  
328 GAAAGAAGCTTGAAGATATTGTTCCCTTCGTCCCACAATTGTGATGTTCCCCA

329 TGTCAACCGTACTGACTACCAGCTGATTGATATCTCTGAGGATGGCTTTGTG  
330 AGTCTTTTGACTGAAAATGGAAACACCAAGGATGATCTGAGGCTTCCCCT  
331 GACGACAGTCTGCTTACCCAGATCAAGGACGGGTTTAATGATGGAAAGGAT  
332 CTTGTGGTGACCGTCATGTCTGCCATGGGTGAGGAGCAGATCTGTGCCCTC  
333 AAGGACATTGG

334 >*Cynara cardunculus* var. *scolymus* eIF5A

335 CACTTTGAGTTCAATGCTGATGCAGGTGCATCCAAAACCTTCCCACAACAA  
336 GCTGGAACCATCCGAAAGAATGGTTACATTGTCATCAAGAACAGACCCTGC  
337 AAGGTTGTTGAGGTTTCTACTTCAAAAACCTGGCAAGCACGGACATGCAAA  
338 ATGTCATTTTGTGGGTATTGATGTATTTACTGGCAAGAAGCTTGAAGATATT  
339 GTTCCTTCATCTCACAATTGTGATGTTCCCTCATGTCTCTCGTACAGATTATCA  
340 ACTTATTGATATCTCTGAAGATGGTTTTGTGAGTCTTCTGACTGAAAGTGGG  
341 ACCACCAAAGATGATCTCAGGCTTCCCACAGACGAAAATCTTGTTGCTCAG  
342 ATAAAGATGGGTTTGCTGAAGGAAAAGATCTCGTGGTAAGCGTTATGTCC  
343 GCAATGGGAGAAGAACAATCAATTCTCTTAAGGACATTGGCAAGAATTAG

344

345 **Supplementary Data Set S3.** The primers of RT-qPCR of *eif5a<sup>mut</sup>*.

|                 | F                        | R                      |
|-----------------|--------------------------|------------------------|
| <i>eif5a-1</i>  | TTCTCACAACCTGTGATGTTCCCT | CTACTTGGGGCCAACGTCCTTG |
| <i>eif5a-2</i>  | TTCTCACAATTGTGATGTTCCCT  | CTACTTGGGGCCAATGTCCTTG |
| <i>eif5a-3</i>  | TTCACACAATTGTGATGTGCC    | TTACTTGGGACCAATATCCTTC |
| <i>eif5a-4</i>  | CCACAACCTGTGATGTGCCCAT   | TTAGTTCTTGGTACCAATGTCC |
| <i>eif5a-5</i>  | CCACAACCTGTGATGTGCCACAT  | CTAGTTCTTGGTACCAATGTCC |
| <i>eif5a-6</i>  | TTCACACAATTGTGATGTCCCC   | TTACTTTGGACCAATATCCTTC |
| <i>eif5a-7</i>  | CCACAACCTGTGATGTGCCCAT   | CTAGTTCTTGGTACCAATGTCC |
| <i>eif5a-8</i>  | CCACAACCTGTGATGTGCCACAT  | CTAGTTCTTGGTACCAATGTCC |
| <i>eif5a-9</i>  | TTCACACAATTGTGATGTGCC    | TTACTTGGGACCAATATCCTTC |
| <i>eif5a-10</i> | TTCACACAATTGTGATGTCCCC   | TTACTTTGGACCAATATCCTTC |

346

347

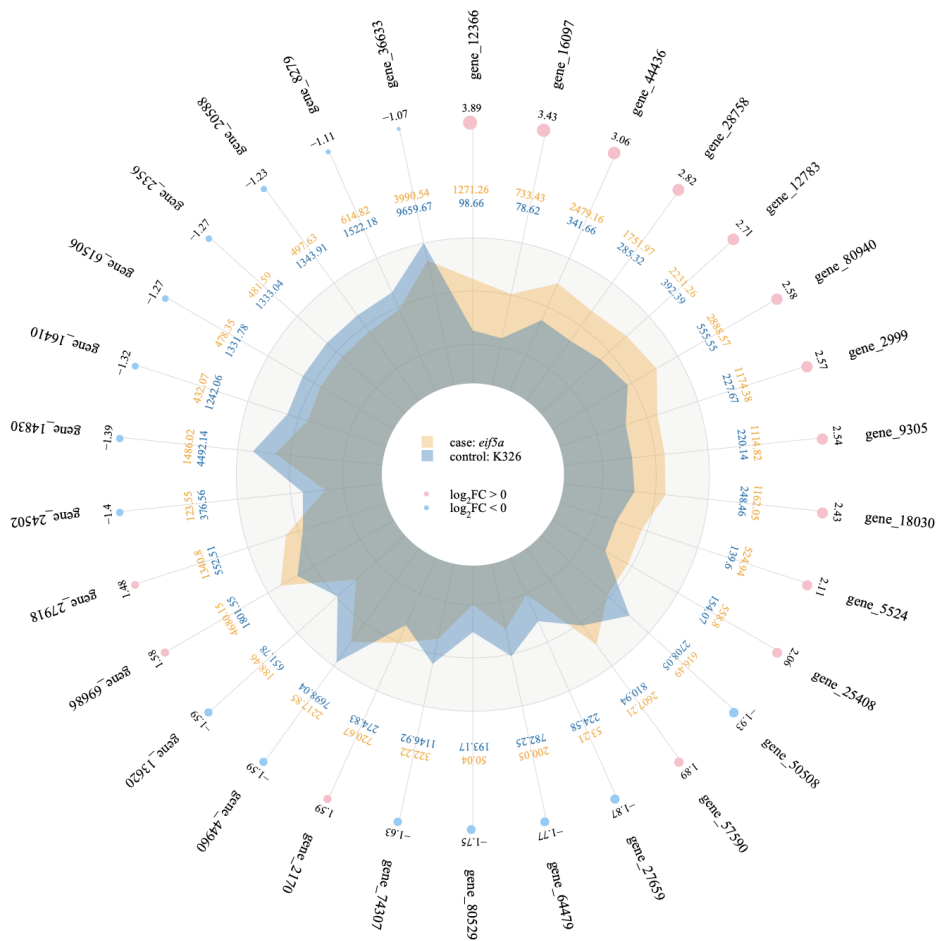

348

349 **Figure S1. The radar for DEGs.**

350 First circle: Upregulated genes are in red, downregulated genes are in light blue, and  
 351 the size of the circles varies according to the magnitude of the  $\log_2(\text{FC})$  values.

352 Second circle: The data in the outer ring represent the average expression levels of the  
 353 experimental group, while the data in the inner ring represent the average expression  
 354 levels of the control group. Third circle: The average expression levels of each gene in  
 355 the experimental group and the control group. For example, if a gene has a very high  
 356 expression level in the control group, a yellow spike will appear in the graph.

357

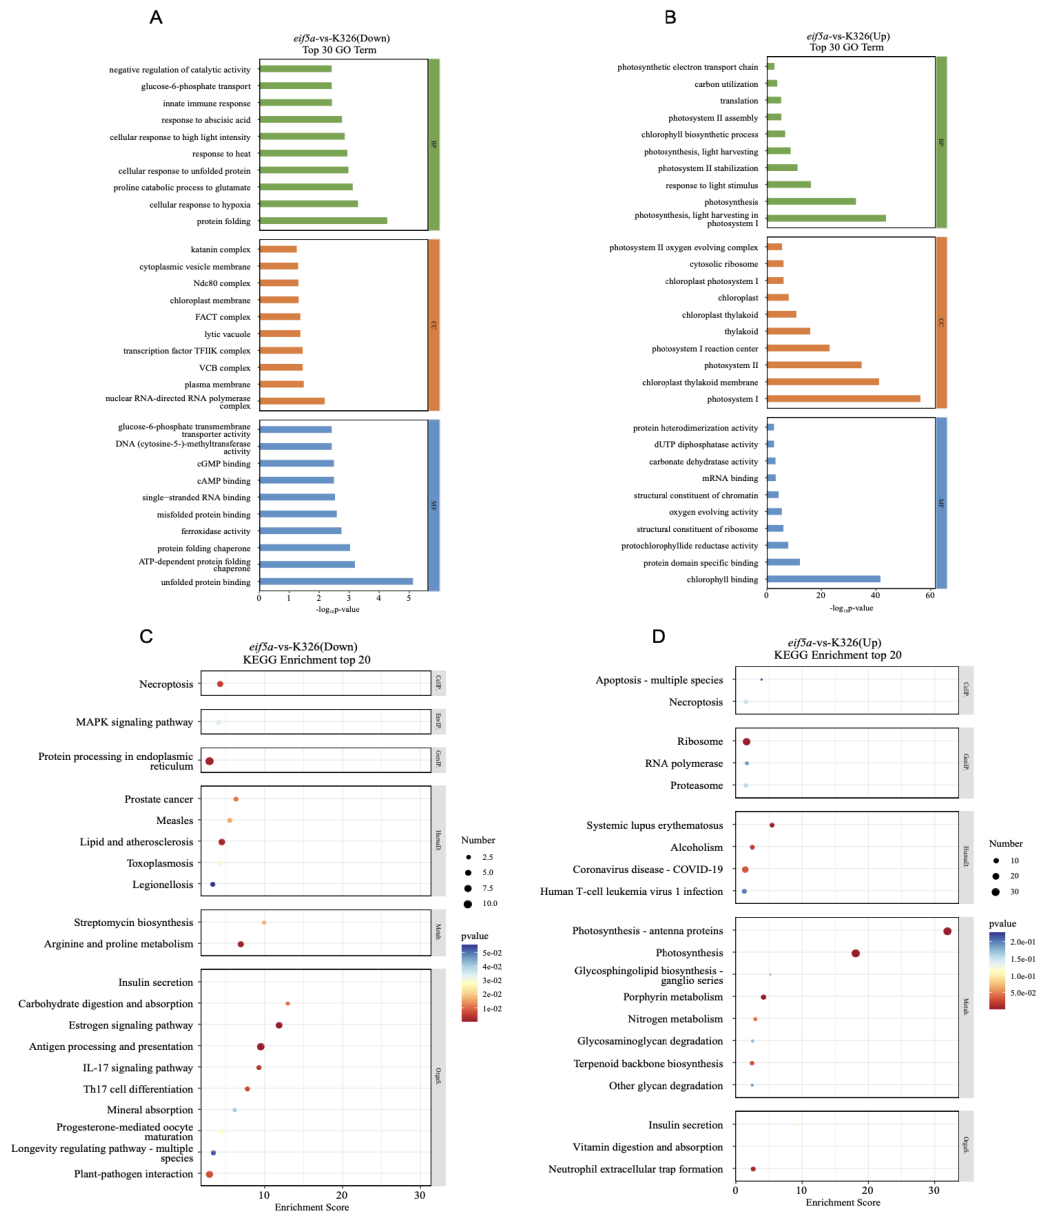

358

359 **Figure S2. Perform GO and KEGG analyses on 1,019 DEGs.**

360 (A) and (B) GO analyze: The top 30 down and up gene entries are presented.

361 (C) and (D) KEGG analyze: The top 20 down and up pathway enrichments are presented.
