# Supplementary material
Source: Research Square preprint supplement (doi:10.21203/rs.3.rs-9146978/v1)
Supplement: Supplementary file 2 [file 754ebd85b12abab8406be9cb.pdf]

**A**

|                                                    |   |   |   |   |   |   |   |   |   |   |   |   |   |   |   |   |   |   |   |   |   |   |   |   |   |   |   |   |   |   |   |   |   |   |   |   |   |   |   |   |   |   |   |   |   |   |   |   |   |   |   |   |   |   |   |   |   |   |   |   |   |   |   |   |   |   |   |   |   |   |    |    |    |
|----------------------------------------------------|---|---|---|---|---|---|---|---|---|---|---|---|---|---|---|---|---|---|---|---|---|---|---|---|---|---|---|---|---|---|---|---|---|---|---|---|---|---|---|---|---|---|---|---|---|---|---|---|---|---|---|---|---|---|---|---|---|---|---|---|---|---|---|---|---|---|---|---|---|---|----|----|----|
| <i>Nicotiana benthamiana</i> eIF5A                 | 1 | S | K | T | Y | P | Q | Q | A | G | T | I | R | K | N | G | Y | I | V | I | K | R | P | C | K | V | V | E | V | S | T | S | K | T | G | K | H | G | H | A | K | C | H | F | V | A | I | D | I | F | N | G | K | K | L | E | D | I | V | P | S | S | H | N | C | D | V | P | H | V | 70 |    |    |
| <i>Capsicum annuum</i> eIF5A                       | 1 | S | K | T | Y | P | Q | Q | A | G | T | I | R | K | N | G | Y | I | V | I | K | R | P | C | K | V | V | E | V | S | T | S | K | T | G | K | H | G | H | A | K | C | H | F | V | A | I | D | I | F | N | G | K | K | L | E | D | I | V | P | S | S | H | N | C | D | V | P | H | V | 70 |    |    |
| <i>Solanum verrucosum</i> eIF5A                    | 1 | S | K | T | Y | P | Q | Q | A | G | T | I | R | K | N | G | Y | I | V | I | K | R | P | C | K | V | V | E | V | S | T | S | K | T | G | K | H | G | H | A | K | C | H | F | V | A | I | D | I | F | N | G | K | K | L | E | D | I | V | P | S | S | H | N | C | D | V | P | H | V | 70 |    |    |
| <i>Solanum lycopersicum</i> eIF5A                  | 1 | S | K | T | Y | P | Q | Q | A | G | T | I | R | K | N | G | Y | I | V | I | K | R | P | C | K | V | V | E | V | S | T | S | K | T | G | K | H | G | H | A | K | C | H | F | V | A | I | D | I | F | N | G | K | K | L | E | D | I | V | P | S | S | H | N | C | D | V | P | H | V | 70 |    |    |
| <i>Nicotiana tabacum</i> eIF5A                     | 1 | S | K | T | Y | P | Q | Q | A | G | T | I | R | K | N | G | Y | I | V | I | K | R | P | C | K | V | V | E | V | S | T | S | K | T | G | K | H | G | H | A | K | C | H | F | V | A | I | D | I | F | N | G | K | K | L | E | D | I | V | P | S | S | H | N | C | D | V | P | H | V | 70 |    |    |
| <i>Nicotiana attenuata</i> eIF5A                   | 1 | S | K | T | Y | P | Q | Q | A | G | T | I | R | K | N | G | Y | I | V | I | K | R | P | C | K | V | V | E | V | S | T | S | K | T | G | K | H | G | H | A | K | C | H | F | V | A | I | D | I | F | N | G | K | K | L | E | D | I | V | P | S | S | H | N | C | D | V | P | H | V | 70 |    |    |
| <i>Salvia miltiorrhiza</i> eIF5A                   | 1 | S | K | T | Y | P | Q | Q | A | G | T | I | R | K | N | G | Y | I | V | I | K | R | P | C | K | V | V | E | V | S | T | S | K | T | G | K | H | G | H | A | K | C | H | F | V | A | I | D | I | F | N | G | K | K | L | E | D | I | V | P | S | S | H | N | C | D | V | P | H | V | 70 |    |    |
| <i>Quercus robur</i> eIF5A                         | 1 | S | K | T | Y | P | Q | Q | A | G | T | I | R | K | N | G | Y | I | V | I | K | R | P | C | K | V | V | E | V | S | T | S | K | T | G | K | H | G | H | A | K | C | H | F | V | A | I | D | I | F | N | G | K | K | L | E | D | I | V | P | S | S | H | N | C | D | V | P | H | V | 70 |    |    |
| <i>Salvia hispanica</i> eIF5A                      | 1 | S | K | T | Y | P | Q | Q | A | G | T | I | R | K | N | G | H | L | V | I | K | R | P | C | K | V | V | E | V | S | T | S | K | T | G | K | H | G | H | A | K | C | H | F | V | A | I | D | I | F | N | G | K | K | L | E | D | I | V | P | S | S | H | N | C | D | V | P | H | V | 70 |    |    |
| <i>Pyrus bretschneideri</i> eIF5A                  | 1 | S | K | T | Y | P | Q | Q | A | G | T | I | R | K | N | G | Y | I | V | I | K | A | R | P | C | K | V | V | E | V | S | T | S | K | T | G | K | H | G | H | A | K | C | H | F | V | A | I | D | I | F | N | G | K | K | L | E | D | I | V | P | S | S | H | N | C | D | V | P | H | V  | 70 |    |
| <i>Mangifera indica</i> eIF5A                      | 1 | S | K | T | F | P | Q | Q | A | G | T | I | R | K | N | G | Y | I | V | I | K | A | R | P | C | K | V | V | E | V | S | T | S | K | T | G | K | H | G | H | A | K | C | H | F | V | G | I | D | I | F | T | G | K | K | L | E | D | I | V | P | S | S | H | N | C | D | V | P | H | V  | 70 |    |
| <i>Impatiens glandulifera</i> eIF5A                | 1 | S | K | T | Y | P | Q | Q | A | G | T | I | R | K | G | G | H | I | C | I | K | N | R | P | C | K | V | V | E | V | S | T | S | K | T | G | K | H | G | H | A | K | C | H | F | V | A | I | D | I | F | T | A | K | K | L | E | D | I | V | P | S | S | H | N | C | D | V | P | H | V  | 70 |    |
| <i>Populus nigra</i> eIF5A                         | 1 | S | K | T | Y | P | Q | Q | A | G | T | I | R | K | N | G | Y | I | V | I | K | N | R | P | C | K | V | V | E | V | S | T | S | K | T | G | K | H | G | H | A | K | C | H | F | V | G | I | D | I | F | N | G | K | K | L | E | D | I | V | P | S | S | H | N | C | D | V | P | H | V  | 70 |    |
| <i>Vicia villosa</i> eIF5A                         | 1 | S | K | T | Y | P | Q | Q | A | G | T | I | R | K | N | G | Y | I | V | I | K | R | P | C | K | V | V | E | V | S | T | S | K | T | G | K | H | G | H | A | K | C | H | F | V | A | I | D | I | F | N | G | K | K | L | E | D | I | V | P | S | S | H | N | C | D | V | P | H | V | 70 |    |    |
| <i>Malus ioensis cultivar</i> eIF5A                | 1 | S | K | T | Y | P | Q | Q | A | G | T | I | R | K | N | G | Y | I | V | I | K | A | R | P | C | K | V | V | E | V | S | T | S | K | T | G | K | H | G | H | A | K | C | H | F | V | A | I | D | I | F | N | G | K | K | L | E | D | I | V | P | S | S | H | N | C | D | V | P | H | V  | 70 |    |
| <i>Trifolium pratense</i> eIF5A                    | 1 | S | K | T | Y | P | Q | Q | A | G | T | I | R | K | N | G | Y | I | V | I | K | R | P | Y | K | V | V | E | V | S | T | S | K | T | G | K | H | G | H | A | K | C | H | F | V | A | I | D | I | F | N | G | K | K | L | E | D | I | V | P | S | S | H | N | C | D | V | P | H | V | 70 |    |    |
| <i>Helianthus annuus</i> eIF5A                     | 1 | S | K | T | Y | P | Q | Q | A | G | T | I | R | K | N | G | Y | I | V | I | K | N | A | R | P | C | K | V | V | E | V | S | T | S | K | T | G | K | H | G | H | A | K | C | H | F | V | A | I | D | I | F | N | G | K | K | L | E | D | I | V | P | S | S | H | N | C | D | V | P | H  | V  | 70 |
| <i>Malus domestica</i> eIF5A                       | 1 | S | K | T | Y | P | Q | Q | A | G | T | I | R | K | N | G | Y | I | V | I | K | A | R | P | C | K | V | V | E | V | S | T | S | K | T | G | K | H | G | H | A | K | C | H | F | V | A | I | D | I | F | N | G | K | K | L | E | D | I | V | P | S | S | H | N | C | D | V | P | H | V  | 70 |    |
| <i>Cynara cardunculus</i> var. <i>scolym</i> eIF5A | 1 | S | K | T | F | P | Q | Q | A | G | T | I | R | K | N | G | Y | I | V | I | K | N | R | P | C | K | V | V | E | V | S | T | S | K | T | G | K | H | G | H | A | K | C | H | F | V | G | I | D | V | F | T | G | K | K | L | E | D | I | V | P | S | S | H | N | C | D | V | P | H | V  | 70 |    |

|                                     |    |   |   |   |   |   |   |   |   |   |   |   |   |   |   |   |   |   |   |   |   |   |   |   |   |   |   |   |   |   |   |   |   |   |   |   |   |   |   |   |   |   |   |   |   |   |   |   |   |   |   |   |   |   |   |   |   |   |   |   |   |   |   |   |     |     |
|-------------------------------------|----|---|---|---|---|---|---|---|---|---|---|---|---|---|---|---|---|---|---|---|---|---|---|---|---|---|---|---|---|---|---|---|---|---|---|---|---|---|---|---|---|---|---|---|---|---|---|---|---|---|---|---|---|---|---|---|---|---|---|---|---|---|---|---|-----|-----|
| <i>Nicotiana benthamiana</i> eIF5A  | 71 | N | R | T | D | Y | Q | L | I | D | I | S | E | D | G | F | V | S | L | L | T | E | N | G | N | T | K | D | D | L | R | L | P | T | D | D | T | L | L | S | O | V | K | G | G | F | E | D | G | K | D | L | V | L | S | V | M | S | A | M | G | E | E | O | I   | 134 |
| <i>Capsicum annuum</i> eIF5A        | 71 | N | R | T | D | Y | Q | L | I | D | I | S | E | D | G | F | V | S | L | L | T | E | N | G | N | T | K | D | D | L | R | L | P | T | D | D | T | L | L | S | O | V | K | G | G | F | E | D | G | K | D | L | V | L | S | V | M | S | A | M | G | E | E | O | I   | 134 |
| <i>Solanum verrucosum</i> eIF5A     | 71 | N | R | T | D | Y | Q | L | I | D | I | S | E | D | G | F | V | S | L | L | T | E | N | G | N | T | K | D | D | L | R | L | P | T | D | D | A | L | L | T | O | V | K | G | G | F | E | D | G | K | D | L | V | L | S | V | M | S | A | M | G | E | E | O | I   | 134 |
| <i>Solanum lycopersicum</i> eIF5A   | 71 | N | R | T | D | Y | Q | L | I | D | I | S | E | D | G | F | V | S | L | L | T | E | N | G | N | T | K | D | D | L | R | L | P | T | D | D | T | L | L | N | O | V | K | G | G | F | E | D | G | K | D | L | V | L | S | V | M | S | A | M | G | E | E | O | I   | 134 |
| <i>Nicotiana tabacum</i> eIF5A      | 71 | N | R | T | D | Y | Q | L | I | D | I | S | E | D | G | F | V | S | L | L | T | E | S | G | N | T | K | D | D | L | R | L | P | T | D | E | A | L | L | K | O | V | K | D | G | F | O | D | G | K | D | L | V | S | V | M | S | A | M | G | E | E | O | I | 134 |     |
| <i>Nicotiana attenuata</i> eIF5A    | 71 | N | R | T | D | Y | Q | L | I | D | I | S | E | D | G | F | V | S | L | L | T | E | N | G | N | T | K | D | D | L | R | L | P | T | D | D | A | L | L | N | O | V | K | G | G | F | E | D | G | K | D | L | V | L | S | V | M | S | A | M | G | E | E | O | I   | 134 |
| <i>Salvia miltiorrhiza</i> eIF5A    | 71 | N | R | T | D | Y | Q | L | I | D | I | S | E | D | G | F | V | S | L | L | T | E | N | G | N | T | K | D | D | L | R | L | P | T | D | D | S | L | L | G | P | I | K | S | G | F | A | D | G | K | D | L | V | V | S | V | M | S | A | M | G | E | E | O | I   | 134 |
| <i>Quercus robur</i> eIF5A          | 71 | N | R | T | D | Y | Q | L | I | D | I | S | E | D | G | F | V | S | L | L | T | E | N | G | N | T | K | D | D | L | R | L | P | T | D | D | S | L | L | S | O | I | K | D | G | F | A | D | G | K | D | L | V | V | T | V | M | S | A | M | G | E | E | O | I   | 134 |
| <i>Salvia hispanica</i> eIF5A       | 71 | N | R | T | D | Y | Q | L | I | D | I | S | E | D | G | F | V | S | L | L | T | E | N | G | N | T | K | D | D | L | R | L | P | T | D | D | T | L | L | G | O | I | K | S | G | F | E | D | G | K | D | L | V | V | S | V | M | S | A | M | G | E | E | O | I   | 134 |
| <i>Pyrus bretschneideri</i> eIF5A   | 71 | N | R | T | D | Y | Q | L | I | D | I | S | E | D | G | F | V | S | L | L | T | E | N | G | N | T | K | D | D | L | R | L | P | T | D | D | S | L | L | T | O | I | K | D | G | F | N | D | G | K | D | L | V | V | T | V | M | S | A | M | G | E | E | O | I   | 134 |
| <i>Mangifera indica</i> eIF5A       | 71 | N | R | T | D | Y | Q | L | I | D | I | S | E | D | G | F | V | S | L | L | T | E | N | G | N | T | K | D | D | L | R | L | P | T | D | D | N | L | L | T | O | I | K | D | G | F | A | D | G | K | D | L | V | V | T | V | M | S | A | M | G | E | E | O | I   | 134 |
| <i>Impatiens glandulifera</i> eIF5A | 71 | N | R | T | D | Y | Q | L | I | D | I | S | E | D | G | F | V | S | L | L | T | E | N | G | N | T | K | D | D | L | R | L | P | T | D | D | A | L | L | T | O | I | K | D | G | F | F | G | K | D | L | V | V | T | V | M | S | A | M | G | E | E | O | I | 134 |     |
| <i>Populus nigra</i> eIF5A          | 71 | N | R | T | D | Y | Q | L | I | D | I | S | E | D | G | F | V | S | L | L | T | E | N | G | N | T | K | D | D | L | R | L | P | T | D | D | S | L | L | T | P | I | K | D | G | F | E | D | G | K | D | L | V | V | T | V | M | S | A | M | G | E | E | O | I   | 134 |
| <i>Vicia villosa</i> eIF5A          | 71 | N | R | T | D | Y | Q | L | I | D | I | S | E | D | G | F | V | S | L | L | T | D | N | G | S | T | K | D | D | L | K | L | P | T | D |   |   |   |   |   |   |   |   |   |   |   |   |   |   |   |   |   |   |   |   |   |   |   |   |   |   |   |   |   |     |     |

A

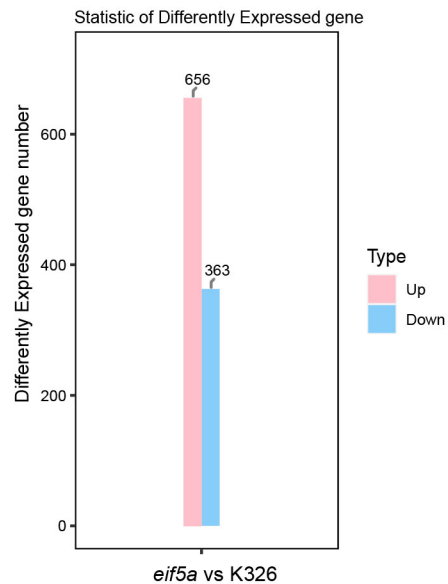

B

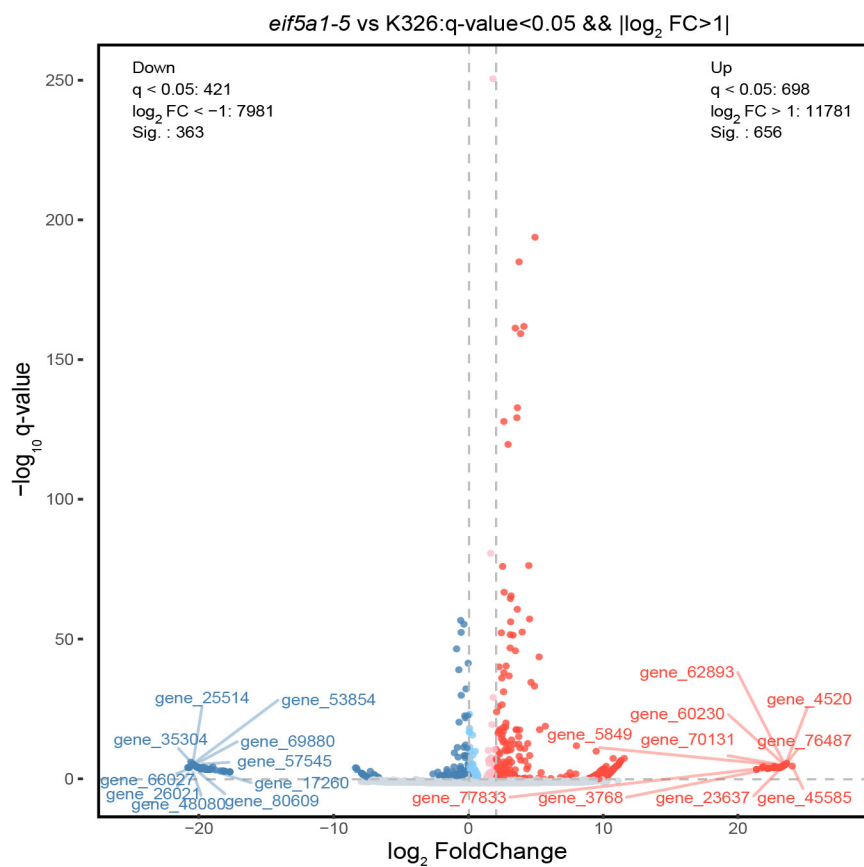

C

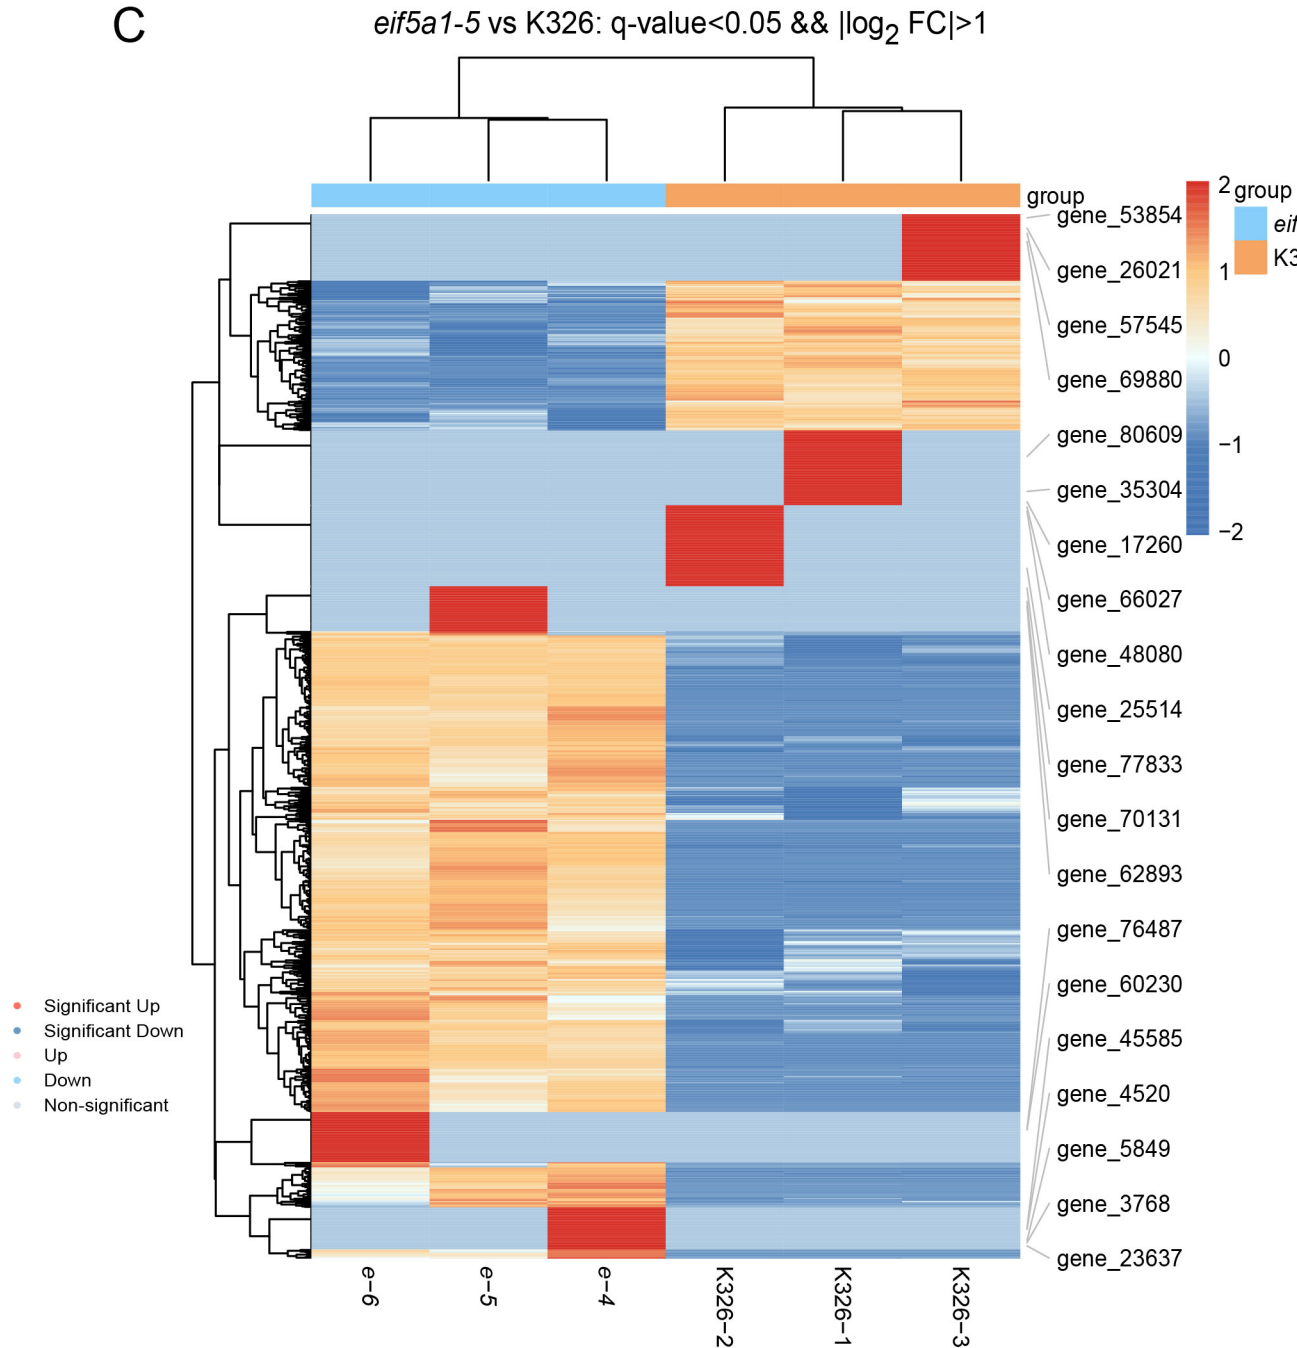

A

*eif5a1-5* vs K326  
Top 30 GO Term

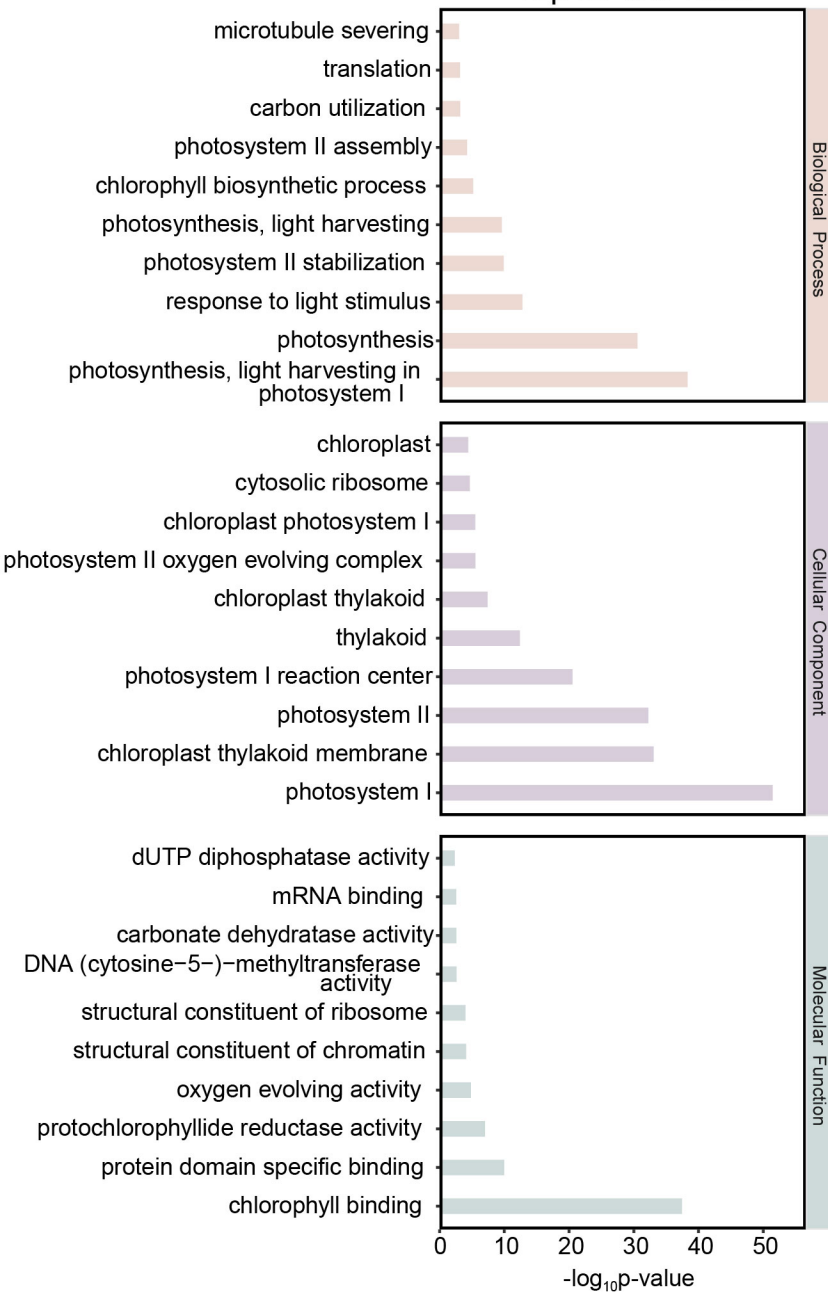

B

*eif5a1-5* vs K326  
KEGG Enrichment top 20

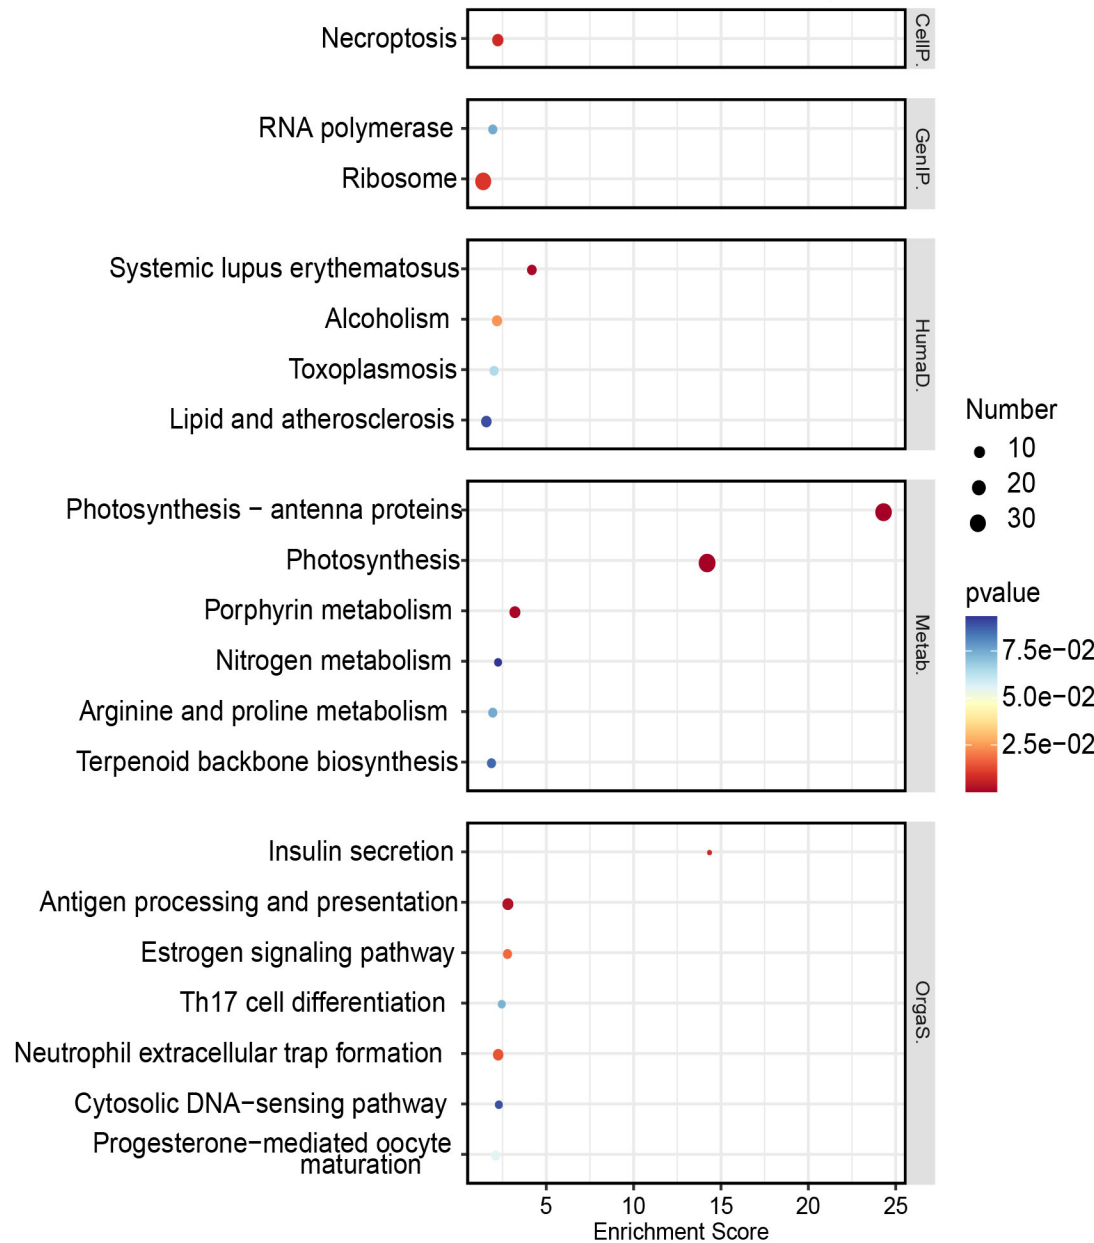

A

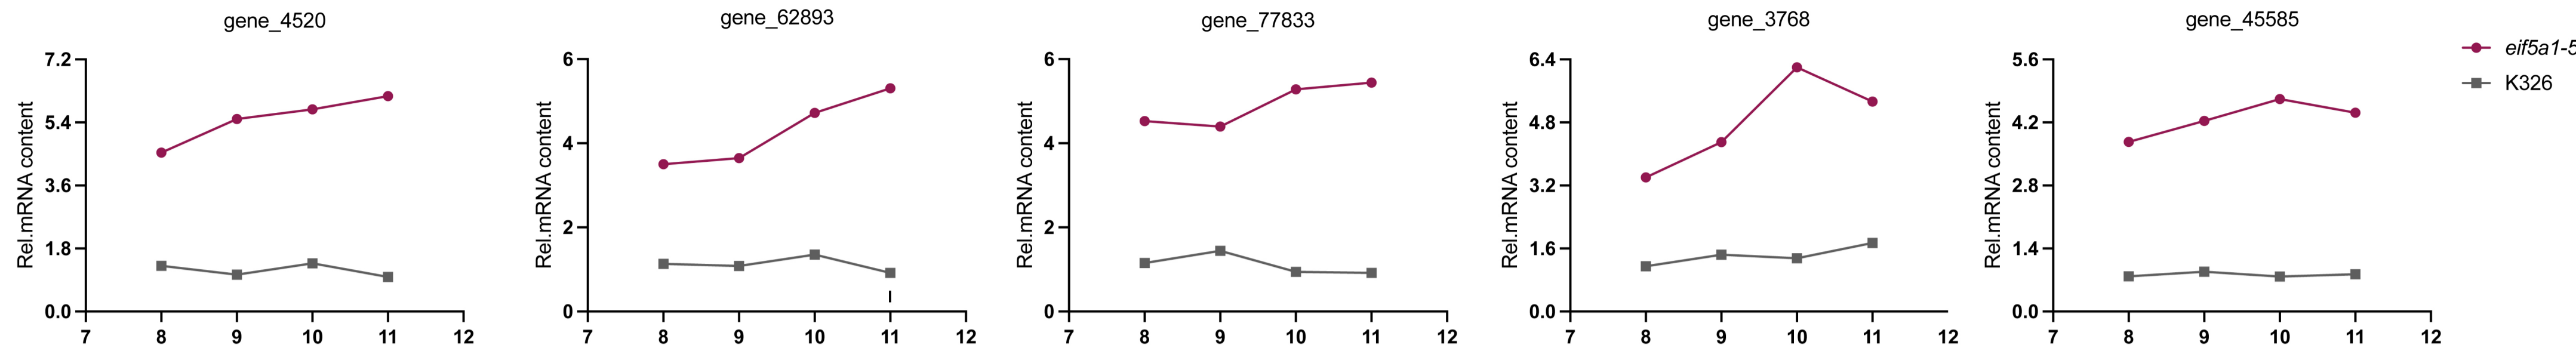

B

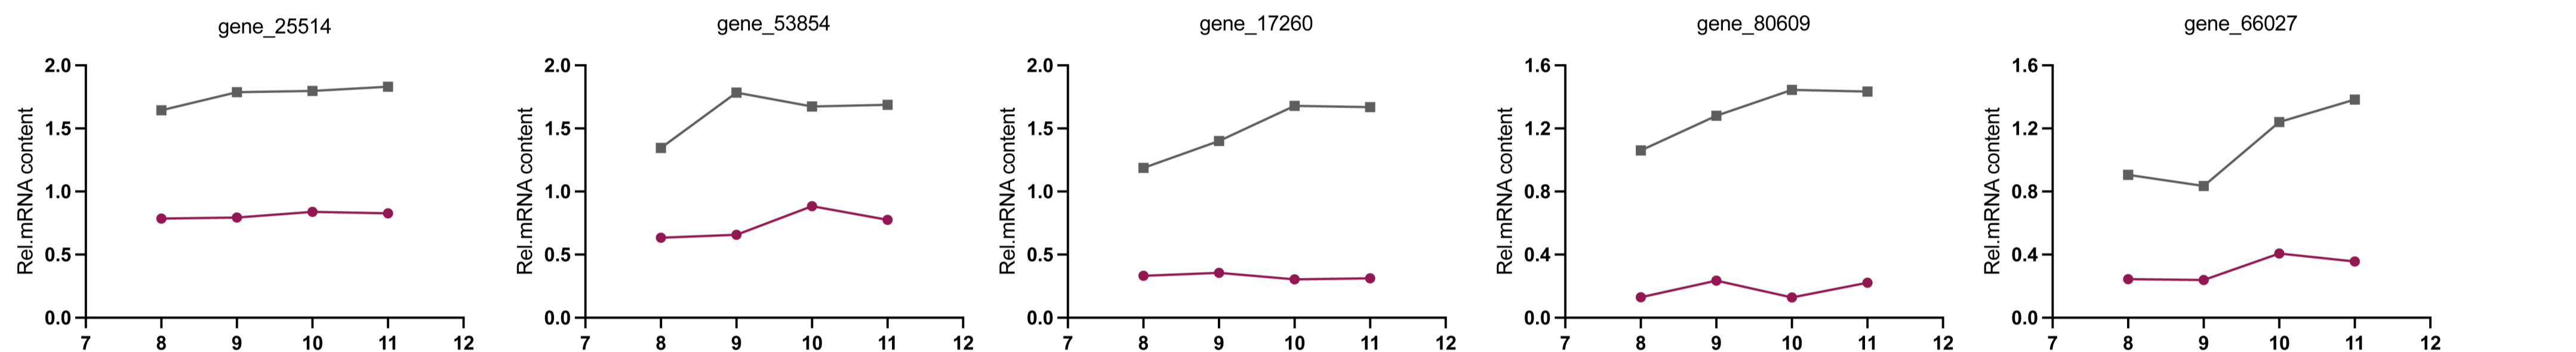

C

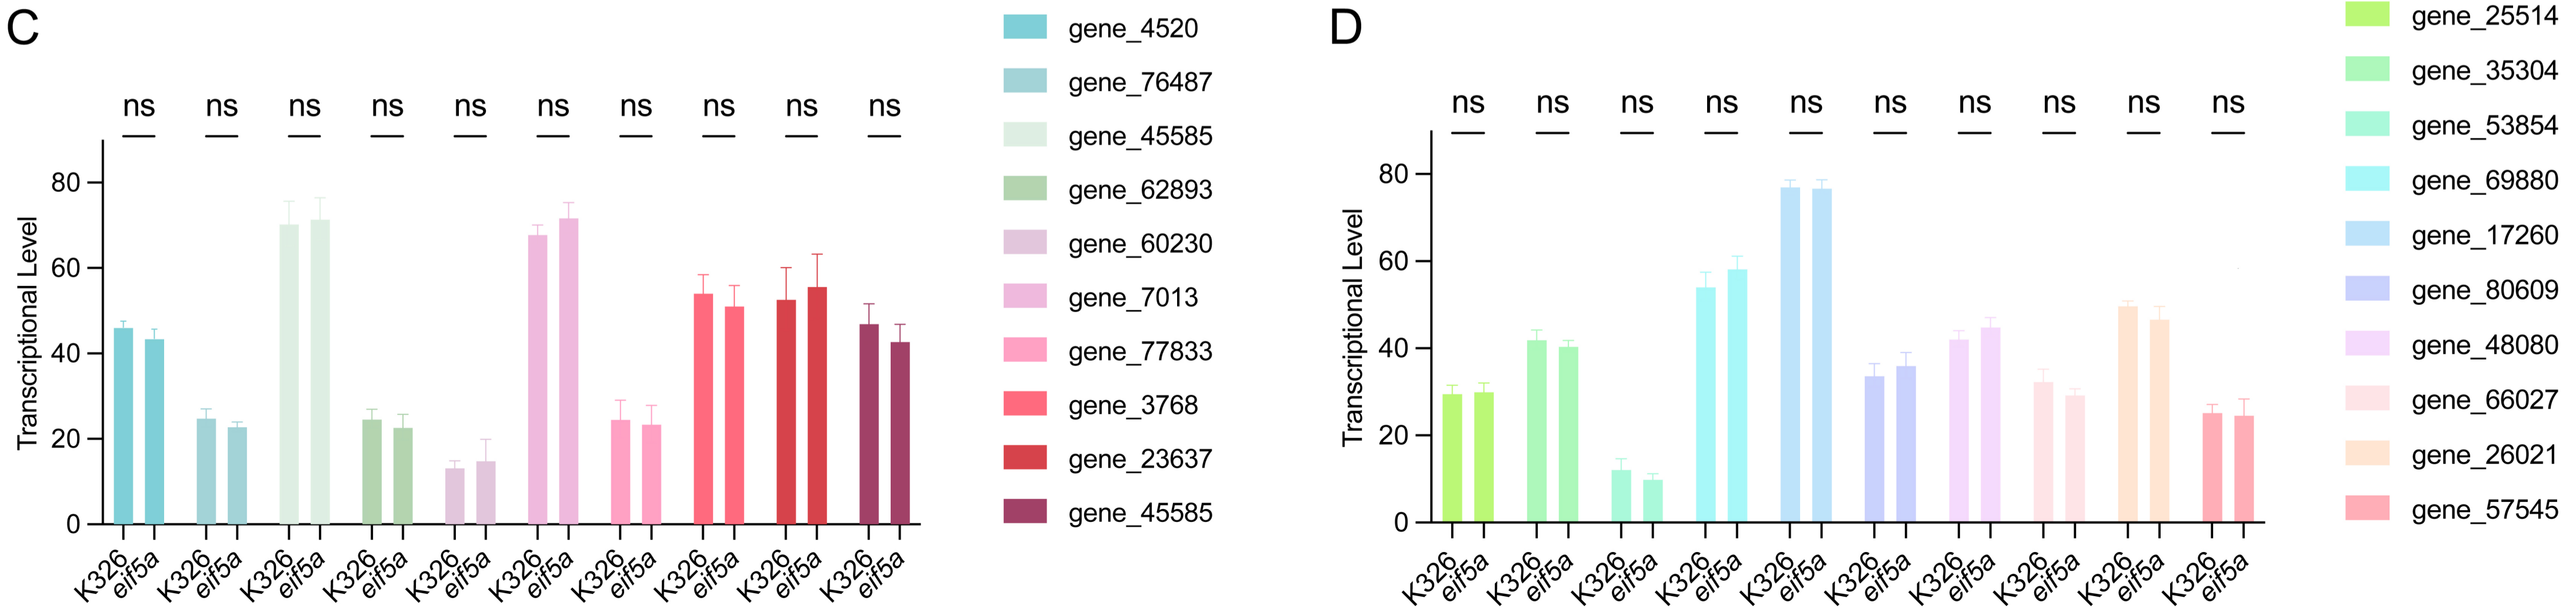

D

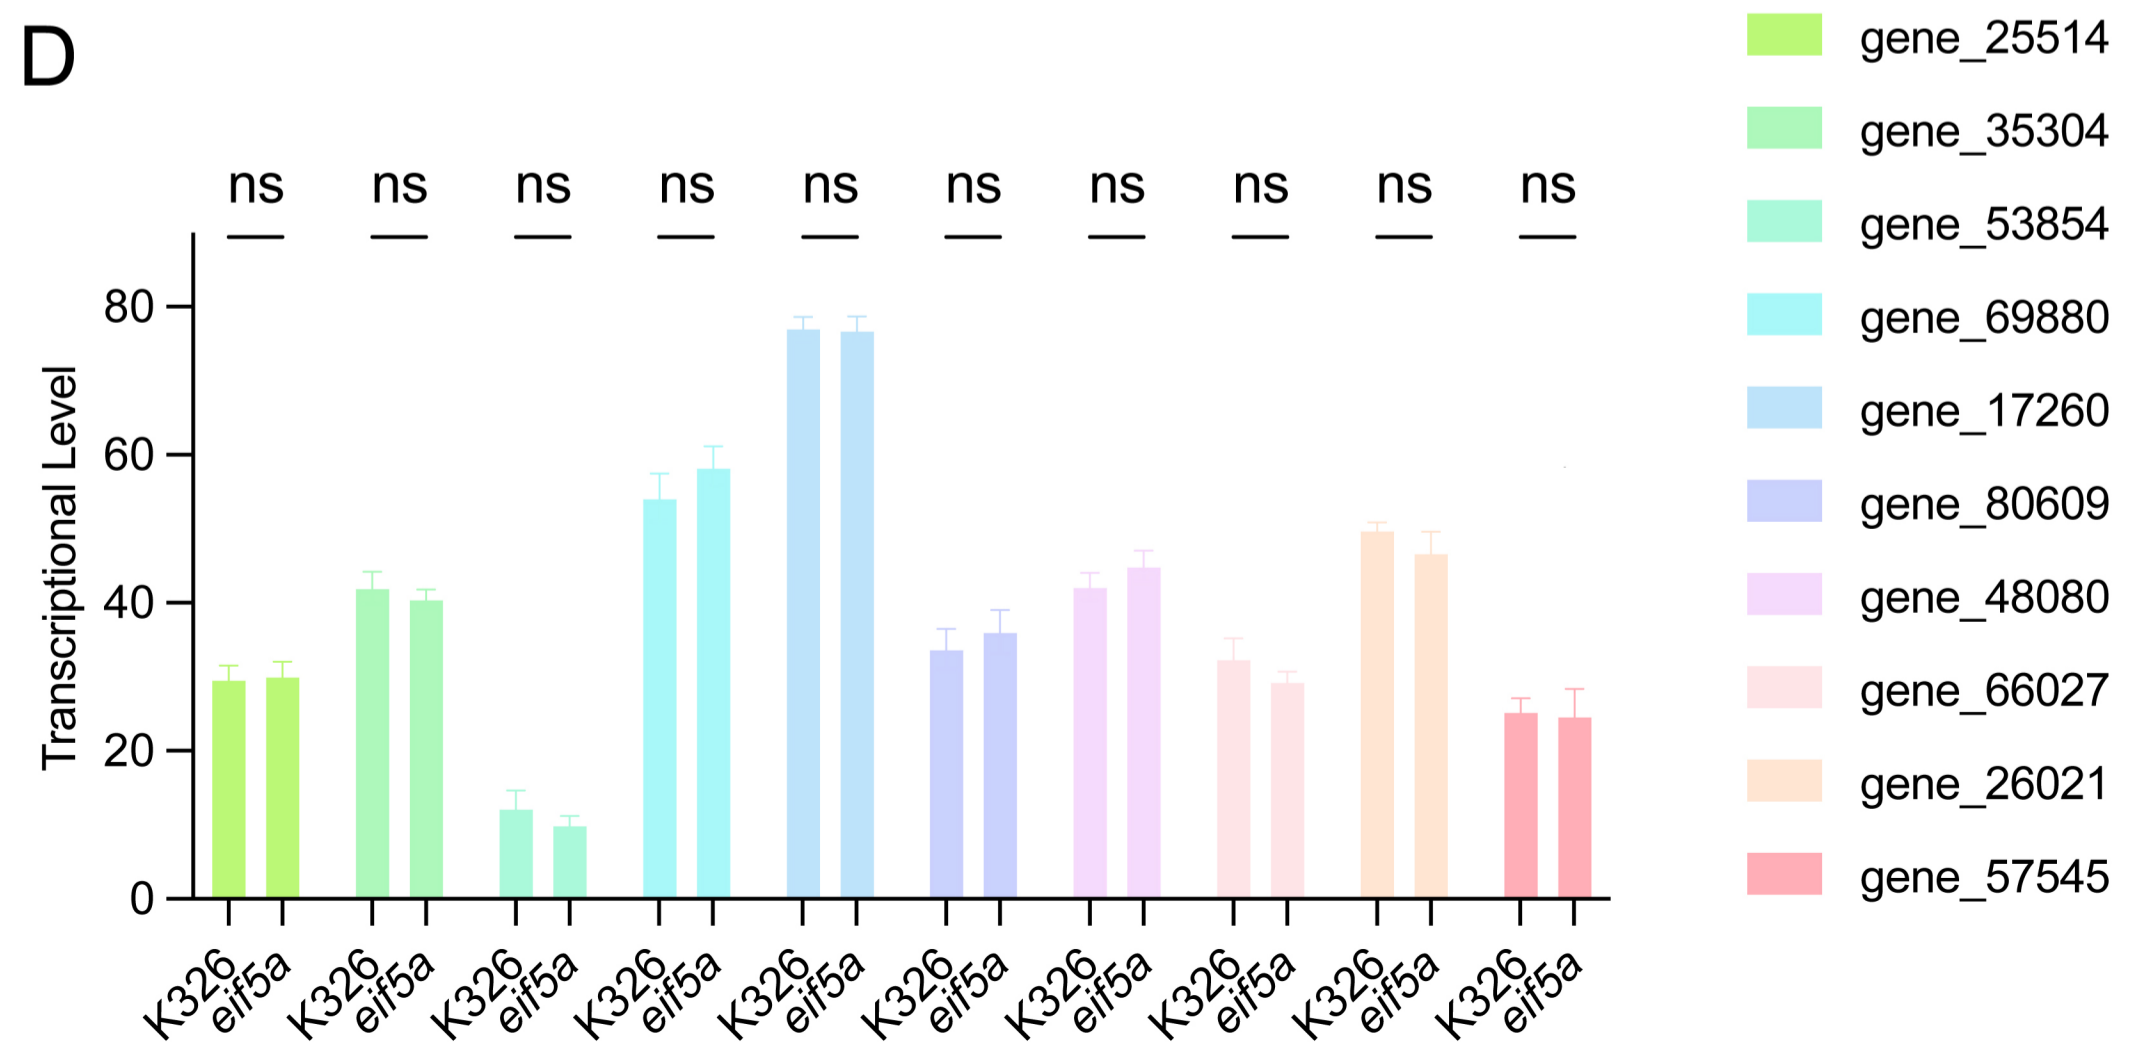

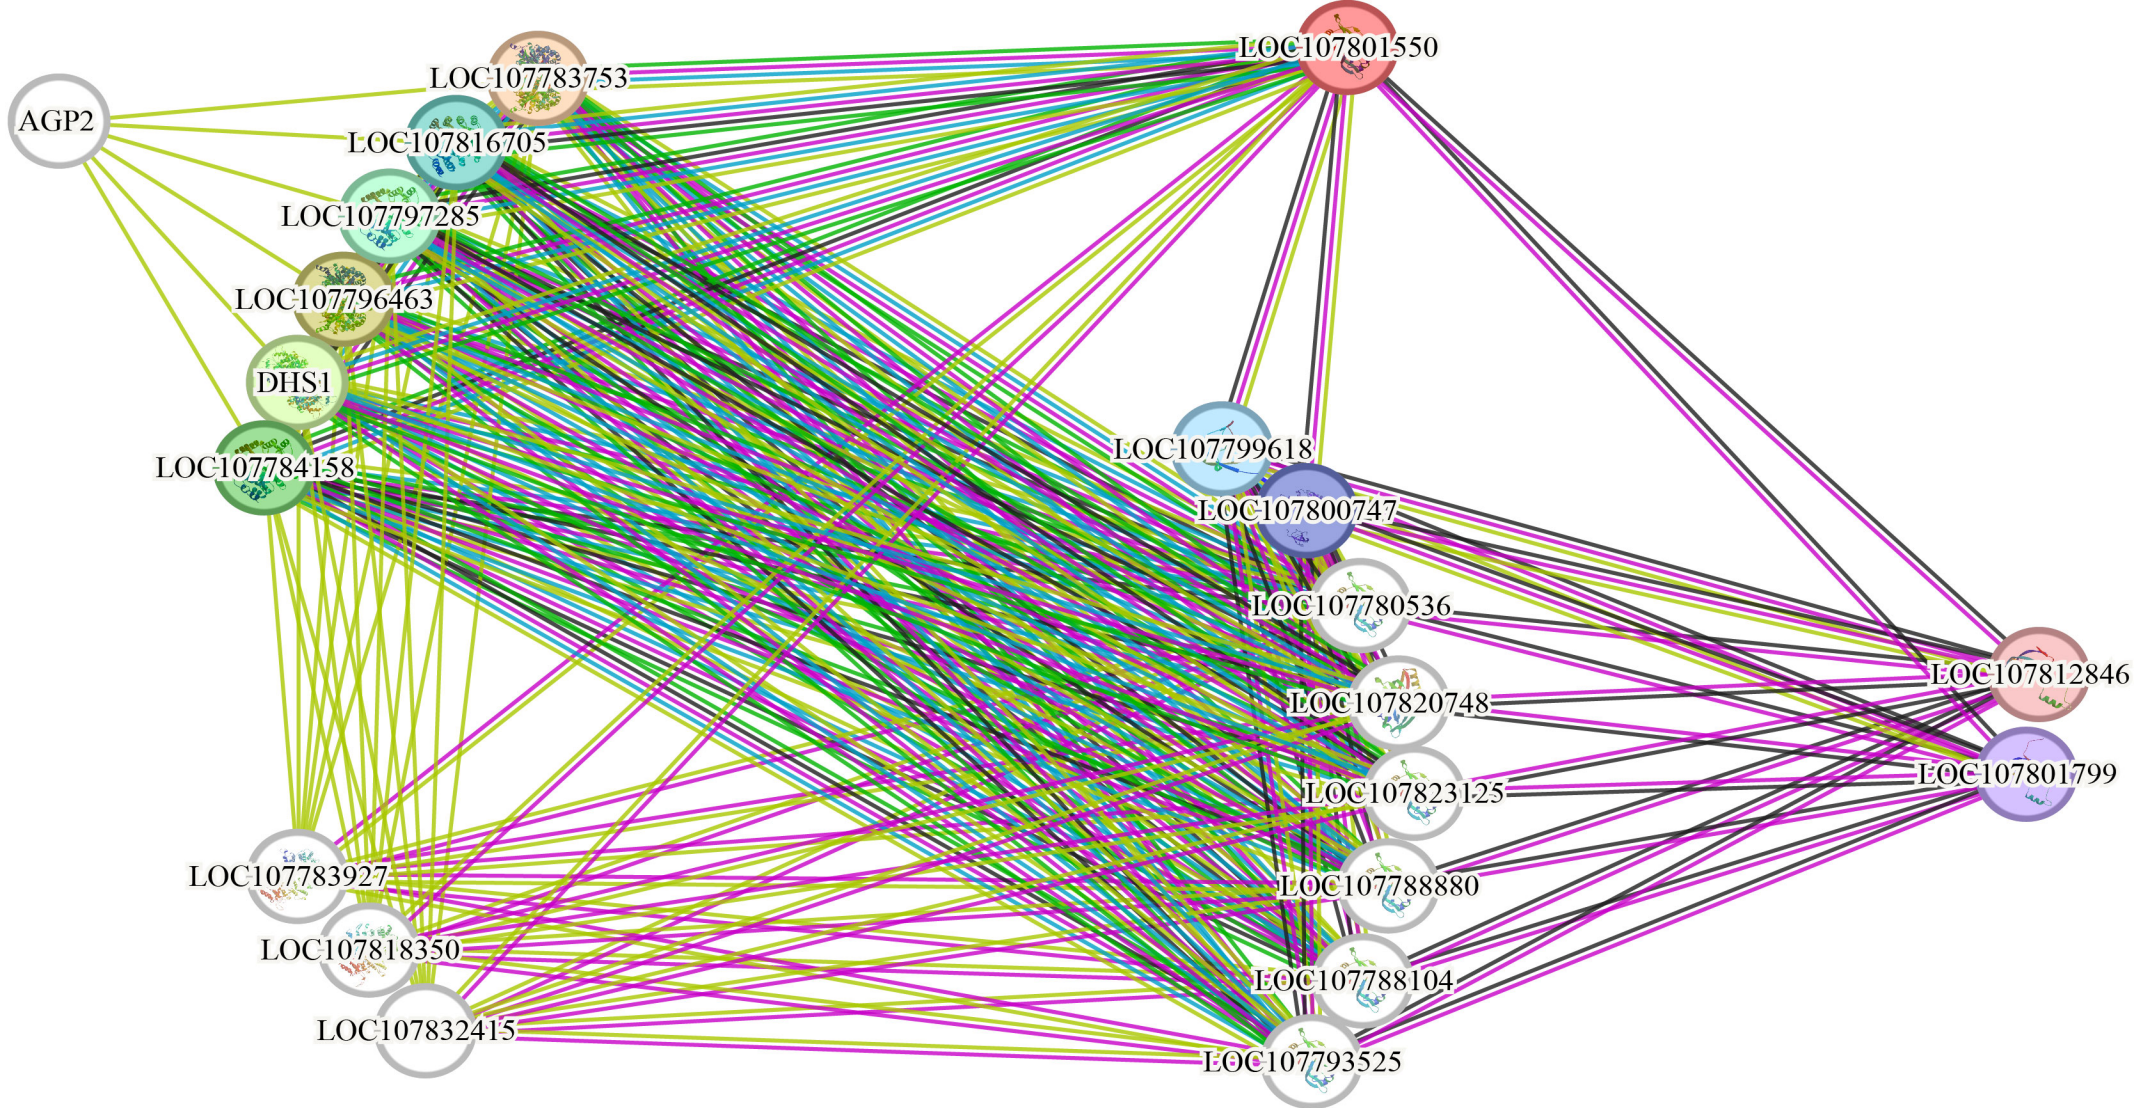

**Known Interaction**

- — ● from curated databases
- — ● experimentally determined

**Predicted Interaction**

- — ● gene neighborhood
- — ● gene fusion
- — ● gene co-occurrence

**Others**

- — ● co-expression
- — ● textmining
- — ● protein homology
